# Supplementary material for: Evaluation and Comparison of Dermo-Cosmetic Activities of Three Oak Species by Targeting Antioxidant Metabolites and Skin Enzyme Inhibitors
Source: MDPI journal article supplement (doi:10.3390/metabo13070804), 2023-06-28
Supplement: s1 [file s1]

## Supplementary data

**Table S1:** Inhibition percentage of the 5 antioxidant assays per species for the 4 fractions and the total extract. The final concentration tested was 25 µg/mL. Activity percentages of fractions that are identical to those of the crude extract (rows) are noted \* for significant values  $p < 0.001$  according to Dunnett's test. Activity percentages that are identical for the same fraction among the 3 species (columns) have the same superscript letter for significant values  $p < 0.001$  according to Tukey's test.

| Colorimetric tests | Species     | Crude extract     | F1               | F2                | F3                | F4               |
|--------------------|-------------|-------------------|------------------|-------------------|-------------------|------------------|
|                    |             | % activity        |                  | % activity        |                   |                  |
| DPPH               | Pedunculate | 74 <sup>*a</sup>  | 74 <sup>*a</sup> | 79 <sup>a</sup>   | 75 <sup>*a</sup>  | 66 <sup>a</sup>  |
|                    | Sessile     | 70 <sup>*b</sup>  | 34 <sup>b</sup>  | 75 <sup>b</sup>   | 76 <sup>a</sup>   | 61 <sup>b</sup>  |
|                    | Pubescent   | 72 <sup>*ab</sup> | 62 <sup>c</sup>  | 78 <sup>a</sup>   | 76 <sup>a</sup>   | 43 <sup>c</sup>  |
| ABTS               | Pedunculate | 96 <sup>*a</sup>  | 94 <sup>*a</sup> | 96 <sup>*a</sup>  | 96 <sup>*a</sup>  | 86 <sup>a</sup>  |
|                    | Sessile     | 96 <sup>*a</sup>  | 59 <sup>b</sup>  | 96 <sup>*a</sup>  | 96 <sup>*a</sup>  | 94 <sup>*b</sup> |
|                    | Pubescent   | 96 <sup>*a</sup>  | 72 <sup>c</sup>  | 96 <sup>*a</sup>  | 96 <sup>*a</sup>  | 53 <sup>c</sup>  |
| CUPRAC             | Pedunculate | 53 <sup>*a</sup>  | 28 <sup>a</sup>  | 70 <sup>a</sup>   | 60 <sup>a</sup>   | 24 <sup>a</sup>  |
|                    | Sessile     | 40 <sup>*b</sup>  | 13 <sup>b</sup>  | 72 <sup>a</sup>   | 57 <sup>b</sup>   | 25 <sup>a</sup>  |
|                    | Pubescent   | 42 <sup>*b</sup>  | 14 <sup>b</sup>  | 65 <sup>b</sup>   | 59 <sup>ab</sup>  | 10 <sup>b</sup>  |
| FRAP               | Pedunculate | 90 <sup>*a</sup>  | 58 <sup>a</sup>  | 106 <sup>a</sup>  | 93 <sup>a</sup>   | 49 <sup>a</sup>  |
|                    | Sessile     | 80 <sup>*b</sup>  | 27 <sup>b</sup>  | 103 <sup>b</sup>  | 58 <sup>b</sup>   | 48 <sup>a</sup>  |
|                    | Pubescent   | 88 <sup>*a</sup>  | 35 <sup>c</sup>  | 104 <sup>ab</sup> | 100 <sup>c</sup>  | 24 <sup>b</sup>  |
| Iron chelation     | Pedunculate | 97 <sup>*a</sup>  | 97 <sup>*a</sup> | 108 <sup>a</sup>  | 105 <sup>a</sup>  | 98 <sup>*a</sup> |
|                    | Sessile     | 98 <sup>*a</sup>  | 86 <sup>b</sup>  | 104 <sup>b</sup>  | 100 <sup>*b</sup> | 92 <sup>b</sup>  |
|                    | Pubescent   | 103 <sup>*b</sup> | 93 <sup>c</sup>  | 106 <sup>ab</sup> | 101 <sup>*b</sup> | 86 <sup>c</sup>  |

**Table S2:** Inhibition percentage of the 3 enzymatic assays per species for the 4 fractions and the total extract tested at 2 concentrations. Inhibition percentages of fractions that are identical to those of the crude extract (rows) are noted \* for significant values  $p < 0.001$  according to Dunnett's test. Inhibition percentages that are identical for the same fraction among the 3 species (columns) have the same superscript letter for significant values  $p < 0.001$  according to Tukey's test.

| Enzymatic tests  | Concentrations tested | Species     | Crude extract    | F1                | F2               | F3               | F4               |
|------------------|-----------------------|-------------|------------------|-------------------|------------------|------------------|------------------|
|                  |                       |             | % Inhibition     | % Inhibition      |                  |                  |                  |
| Xanthine oxidase | 8.4 $\mu\text{g/mL}$  | Pedunculate | 98 <sup>*a</sup> | 100 <sup>*a</sup> | 97 <sup>*a</sup> | 98 <sup>*a</sup> | 97 <sup>*a</sup> |
|                  |                       | Sessile     | 99 <sup>*a</sup> | 98 <sup>*ab</sup> | 98 <sup>*a</sup> | 96 <sup>a</sup>  | 98 <sup>*a</sup> |
|                  |                       | Pubescent   | 99 <sup>*a</sup> | 96 <sup>cb</sup>  | 99 <sup>*a</sup> | 98 <sup>*a</sup> | 93 <sup>b</sup>  |
|                  | 4 $\mu\text{g/mL}$    | Pedunculate | 63 <sup>*a</sup> | 47 <sup>a</sup>   | 60 <sup>a</sup>  | 57 <sup>a</sup>  | 53 <sup>a</sup>  |
|                  |                       | Sessile     | 54 <sup>*b</sup> | 43 <sup>b</sup>   | 57 <sup>b</sup>  | 59 <sup>a</sup>  | 52 <sup>*a</sup> |
|                  |                       | Pubescent   | 55 <sup>*b</sup> | 43 <sup>b</sup>   | 55 <sup>*b</sup> | 53 <sup>*b</sup> | 47 <sup>b</sup>  |
| Elastase         | 250 $\mu\text{g/mL}$  | Pedunculate | 52 <sup>*a</sup> | 14 <sup>a</sup>   | 26 <sup>a</sup>  | 35 <sup>a</sup>  | 30 <sup>a</sup>  |
|                  |                       | Sessile     | 20 <sup>*b</sup> | 0 <sup>b</sup>    | 18 <sup>*b</sup> | 21 <sup>*b</sup> | 8 <sup>b</sup>   |
|                  |                       | Pubescent   | 56 <sup>*c</sup> | 8 <sup>c</sup>    | 28 <sup>a</sup>  | 25 <sup>c</sup>  | 30 <sup>a</sup>  |
|                  | 125 $\mu\text{g/mL}$  | Pedunculate | 4 <sup>*a</sup>  | 0 <sup>a</sup>    | 9 <sup>a</sup>   | 16 <sup>a</sup>  | 14 <sup>a</sup>  |
|                  |                       | Sessile     | 2 <sup>*a</sup>  | 0 <sup>*a</sup>   | 7 <sup>b</sup>   | 12 <sup>b</sup>  | 0 <sup>*b</sup>  |
|                  |                       | Pubescent   | 15 <sup>*b</sup> | 6 <sup>b</sup>    | 16 <sup>*c</sup> | 8 <sup>c</sup>   | 14 <sup>*a</sup> |
| Collagenase      | 0.4 $\mu\text{g/mL}$  | Pedunculate | 79 <sup>*a</sup> | 70 <sup>a</sup>   | 88 <sup>a</sup>  | 79 <sup>*a</sup> | 65 <sup>a</sup>  |
|                  |                       | Sessile     | 37 <sup>*b</sup> | 56 <sup>b</sup>   | 94 <sup>b</sup>  | 86 <sup>b</sup>  | 68 <sup>b</sup>  |
|                  |                       | Pubescent   | 74 <sup>*c</sup> | 62 <sup>c</sup>   | 81 <sup>c</sup>  | 90 <sup>c</sup>  | 83 <sup>c</sup>  |
|                  | 0.04 $\mu\text{g/mL}$ | Pedunculate | 49 <sup>*a</sup> | 21 <sup>a</sup>   | 64 <sup>a</sup>  | 59 <sup>a</sup>  | 55 <sup>a</sup>  |
|                  |                       | Sessile     | 21 <sup>*b</sup> | 40 <sup>b</sup>   | 64 <sup>a</sup>  | 60 <sup>a</sup>  | 27 <sup>b</sup>  |
|                  |                       | Pubescent   | 56 <sup>*c</sup> | 50 <sup>c</sup>   | 58 <sup>*b</sup> | 69 <sup>c</sup>  | 78 <sup>c</sup>  |

**Table S3:** Description and proposition of annotation of the majority molecules in the most active fractions 2 and 3.

| Fraction number   | Cluster number | R <sub>T</sub> (min) | Measured <i>m/z</i> [M-H] <sup>-</sup> or [M-2H] <sup>2-</sup> | Formula [M]                                     | Error (ppm) | MS/MS fragments [M-H] <sup>-</sup>                                                                                                                                                | Proposed annotation                                            |
|-------------------|----------------|----------------------|----------------------------------------------------------------|-------------------------------------------------|-------------|-----------------------------------------------------------------------------------------------------------------------------------------------------------------------------------|----------------------------------------------------------------|
| Fraction 2        | Single node    | 2.41                 | 990.0807 <sup>2-</sup>                                         | C <sub>87</sub> H <sub>58</sub> O <sub>55</sub> | -2.4        | 1065.1068 C <sub>46</sub> H <sub>33</sub> O <sub>30</sub><br>915.0544 C <sub>41</sub> H <sub>23</sub> O <sub>25</sub>                                                             | Roburin B or C [29,34]                                         |
|                   | Cluster 1      | 2.95                 | 924.0613 <sup>2-</sup>                                         | C <sub>82</sub> H <sub>50</sub> O <sub>51</sub> | -1.8        | 631.0587 C <sub>27</sub> H <sub>19</sub> O <sub>18</sub><br>300.9993 C <sub>14</sub> H <sub>5</sub> O <sub>8</sub>                                                                | Roburin A or D [29,34]                                         |
|                   | Single node    | 3.01                 | 1065.1095 <sup>1-</sup>                                        | C <sub>46</sub> H <sub>34</sub> O <sub>30</sub> | -2.1        | 1021.1164 C <sub>45</sub> H <sub>33</sub> O <sub>28</sub><br>975.0763 C <sub>43</sub> H <sub>27</sub> O <sub>27</sub>                                                             | Grandinin or roburin E [29,34]                                 |
|                   | Single node    | 3.32                 | 1100.0728 <sup>1-</sup>                                        | C <sub>48</sub> H <sub>30</sub> O <sub>31</sub> | -1.1        | 1057.0800 C <sub>47</sub> H <sub>29</sub> O <sub>29</sub><br>933.0635 C <sub>41</sub> H <sub>25</sub> O <sub>26</sub><br>631.0573 C <sub>27</sub> H <sub>19</sub> O <sub>18</sub> | Vescavalonic acid [35]                                         |
|                   | Cluster 1      | 3.91                 | 933.0645 <sup>1-</sup>                                         | C <sub>41</sub> H <sub>26</sub> O <sub>26</sub> | -0.8        | 631.0580 C <sub>27</sub> H <sub>19</sub> O <sub>18</sub><br>300.9991 C <sub>14</sub> H <sub>5</sub> O <sub>8</sub>                                                                | Castalagin or vescalagin [29]                                  |
| Fractions 2 and 3 | Cluster 1      | 4.45                 | 783.0693 <sup>1-</sup>                                         | C <sub>34</sub> H <sub>24</sub> O <sub>22</sub> | 0.2         | 481.0633 C <sub>20</sub> H <sub>17</sub> O <sub>14</sub><br>300.9986 C <sub>14</sub> H <sub>5</sub> O <sub>8</sub><br>275.0186 C <sub>13</sub> H <sub>7</sub> O <sub>7</sub>      | Pedunculagin [36]                                              |
| Fraction 3        | Cluster 7      | 5.10                 | 497.1304 <sup>1-</sup>                                         | C <sub>22</sub> H <sub>26</sub> O <sub>13</sub> | -0.6        | 313.0568 C <sub>13</sub> H <sub>13</sub> O <sub>9</sub><br>169.0140 C <sub>7</sub> H <sub>5</sub> O <sub>5</sub><br>125.0244 C <sub>6</sub> H <sub>5</sub> O <sub>3</sub>         | 3,4,5-trimethoxyphenyl-(6'-O-galloyl)-O-β-glucopyranoside [30] |
|                   | Cluster 9      | 6.85                 | 581.2256 <sup>1-</sup>                                         | C <sub>28</sub> H <sub>38</sub> O <sub>13</sub> | -0.3        | 419.1722 C <sub>22</sub> H <sub>27</sub> O <sub>8</sub>                                                                                                                           | Lyoniresinol glucoside [37]                                    |
|                   | Cluster 9      | 7.38                 | 551.2159 <sup>1-</sup>                                         | C <sub>27</sub> H <sub>36</sub> O <sub>12</sub> | -0.3        | 419.1711 C <sub>22</sub> H <sub>27</sub> O <sub>8</sub>                                                                                                                           | Lyonside [37]                                                  |
|                   | Cluster 10     | 7.65                 | 839.3509 <sup>1-</sup>                                         | C <sub>44</sub> H <sub>56</sub> O <sub>16</sub> | -2.0        | 419.1719 C <sub>22</sub> H <sub>27</sub> O <sub>8</sub>                                                                                                                           | Lyoniresinol [31]                                              |
|                   | Cluster 8      | 7.79                 | 575.2136 <sup>1-</sup>                                         | C <sub>29</sub> H <sub>36</sub> O <sub>12</sub> | -0.4        | 331.1117 C <sub>18</sub> H <sub>19</sub> O <sub>6</sub><br>165.0557 C <sub>9</sub> H <sub>9</sub> O <sub>3</sub>                                                                  | Not identified                                                 |
